# Supplementary material for: Influence of early childhood parental hostility and socioeconomic stress on children’s internalizing symptom trajectories from childhood to adolescence
Source: PubMed Central journal article supplement (PMC11062022; doi:10.3389/fpsyt.2024.1325506), 2024-04-17
Supplement: DataSheet_1.pdf [file DataSheet_1.pdf]

**Supplementary Table 1***Odds Ratios for Predictor-Cohort Interactions and Likelihood of Class Membership*

| Variable                      | Class 1 vs Class 3 | Class 2 vs Class 3 |
|-------------------------------|--------------------|--------------------|
|                               | OR (95% CI)        | OR (95% CI)        |
| Parental Hostility x Cohort   | 1.83 (0.60, 5.64)  | 1.51 (0.68, 3.35)  |
| Parental Hostility            | 0.34 (0.11, 1.00)  | 0.57 (0.26, 1.22)  |
| FLP                           | 0.54 (0.37, 0.78)* | 0.48 (0.34, 0.68)* |
| Female                        | 0.95 (0.71, 1.27)  | 1.10 (0.84, 1.43)  |
| Black                         | 0.78 (0.56, 1.08)  | 0.94 (0.70, 1.26)  |
| Latinx/Other                  | 1.50 (0.94, 2.38)  | 1.41 (0.91, 2.19)  |
| Parent Depressive Symptoms    | 0.19 (0.12, 0.30)* | 0.40 (0.29, 0.56)* |
| Socioeconomic Stress x Cohort | 0.36 (0.18, 0.70)* | 0.54 (0.28, 1.03)  |
| Socioeconomic Stress          | 1.05 (0.57, 1.92)  | 0.94 (0.52, 1.69)  |
| FLP                           | 0.82 (0.43, 1.57)  | 0.71 (0.38, 1.33)  |
| Female                        | 0.95 (0.72, 1.24)  | 1.08 (0.83, 1.40)  |
| Black                         | 1.12 (0.81, 1.56)  | 1.20 (0.88, 1.64)  |
| Latinx/Other                  | 1.78 (1.15, 2.76)* | 1.57 (1.02, 2.41)* |
| Female x Cohort               | 1.70 (0.90, 3.19)  | 1.42 (0.77, 2.62)  |
| Female                        | 0.63 (0.36, 1.09)  | 0.81 (0.48, 1.37)  |
| FLP                           | 0.44 (0.28, 0.68)* | 0.41 (0.26, 0.63)* |
| Black                         | 0.74 (0.55, 1.00)  | 0.90 (0.68, 1.20)  |
| Latinx/Other                  | 1.43 (0.93, 2.20)  | 1.34 (0.88, 2.04)  |

Cohort coded 0 = Early Growth and Development Study (EGDS), 1 = Family Life Project (FLP); Sex-assigned at birth coded 0 = male, 1 = female; Black = dummy coded race/ethnicity where 1 = Black/African American, 0 = other; Other = dummy coded race/ethnicity where 1 = Latinx, and/or Hispanic, and/or other race/ethnicity, 0 = else.

**Supplementary Table 2**

*Socioeconomic Stress Predicting Class 1 Versus 3 Membership, Mediated by Parental Hostility–Replication Including Socioeconomic Stress by Cohort Interaction*

| Outcome                                                           | $\beta$ (SE) | <i>p</i> |
|-------------------------------------------------------------------|--------------|----------|
| Parental Hostility                                                |              |          |
| Socioeconomic Stress                                              | 0.19 (0.11)  | .094     |
| Cohort                                                            | -0.34 (0.12) | .004     |
| Socioeconomic Stress x Cohort                                     | -0.13 (0.12) | .302     |
| Female                                                            | -0.02 (0.05) | .751     |
| Black                                                             | -0.03 (0.06) | .578     |
| Latinx/Other                                                      | -0.12 (0.08) | .109     |
| Class 1 Versus 3                                                  |              |          |
| Socioeconomic Stress                                              | -0.47 (0.38) | .211     |
| Cohort                                                            | 0.49 (0.40)  | .224     |
| Socioeconomic Stress x Cohort                                     | 1.28 (0.42)  | .002     |
| Parental Hostility                                                | 0.55 (0.13)  | <.001    |
| Female                                                            | -0.01 (0.16) | .939     |
| Black                                                             | -0.04 (0.19) | .840     |
| Latinx/Other                                                      | -0.66 (0.26) | .010     |
| Total effect                                                      |              |          |
| FLP Socioeconomic Stress – Class 1 Versus 3                       | 0.84 (0.17)  | <.001    |
| EGDS Socioeconomic Stress – Class 1 Versus 3                      | -0.37 (0.38) | .326     |
| Indirect effect                                                   |              |          |
| FLP Socioeconomic Stress – Parental Hostility – Class 1 Versus 3  | 0.04 (0.03)  | .173     |
| EGDS Socioeconomic Stress – Parental Hostility – Class 1 Versus 3 | 0.11 (0.07)  | .118     |
| Direct effect                                                     |              |          |
| FLP Socioeconomic Stress – Class 1 Versus 3                       | 0.80 (0.17)  | <.001    |
| EGDS Socioeconomic Stress – Class 1 Versus 3                      | -0.47 (0.38) | .211     |

Unstandardized coefficients are reported. Cohort coded 0 = Early Growth and Development Study (EGDS), 1 = Family Life Project (FLP); Sex-assigned at birth coded 0 = male, 1 = female; Black = dummy coded race/ethnicity where 1 = Black/African American, 0 = other; Other = dummy coded race/ethnicity where 1 = Latinx, and/or Hispanic, and/or other race/ethnicity, 0 = else.

**Supplementary Table 3**

*Socioeconomic Stress Predicting Class 2 Versus 3 Membership, Mediated by Parental Hostility–  
Replication Including Socioeconomic Stress by Cohort Interaction*

| Outcome                                                           | $\beta$ (SE) | <i>p</i> |
|-------------------------------------------------------------------|--------------|----------|
| Parental Hostility                                                |              |          |
| Socioeconomic Stress                                              | 0.20 (0.12)  | .085     |
| Cohort                                                            | -0.35 (0.12) | .004     |
| Socioeconomic Stress x Cohort                                     | -0.13 (0.12) | .294     |
| Female                                                            | -0.02 (0.05) | .665     |
| Black                                                             | -0.04 (0.06) | .540     |
| Latinx/Other                                                      | -0.12 (0.08) | .103     |
| Class 2 Versus 3                                                  |              |          |
| Socioeconomic Stress                                              | -0.19 (0.33) | .560     |
| Cohort                                                            | 0.45 (0.35)  | .200     |
| Socioeconomic Stress x Cohort                                     | 0.77 (0.37)  | .034     |
| Parental Hostility                                                | 0.21 (0.10)  | .042     |
| Female                                                            | -0.06 (0.14) | .665     |
| Black                                                             | -0.24 (0.17) | .149     |
| Latinx/Other                                                      | -0.50 (0.23) | .031     |
| Total effect                                                      |              |          |
| FLP Socioeconomic Stress – Class 1 Versus 3                       | 0.60 (0.16)  | <.001    |
| EGDS Socioeconomic Stress – Class 1 Versus 3                      | -0.15 (0.33) | .646     |
| Indirect effect                                                   |              |          |
| FLP Socioeconomic Stress – Parental Hostility – Class 1 Versus 3  | 0.01 (0.01)  | .226     |
| EGDS Socioeconomic Stress – Parental Hostility – Class 1 Versus 3 | 0.04 (0.03)  | .191     |
| Direct effect                                                     |              |          |
| FLP Socioeconomic Stress – Class 1 Versus 3                       | 0.58 (0.16)  | <.001    |
| EGDS Socioeconomic Stress – Class 1 Versus 3                      | -0.19 (0.33) | .560     |

Unstandardized coefficients are reported. Cohort coded 0 = Early Growth and Development Study (EGDS), 1 = Family Life Project (FLP); Sex-assigned at birth coded 0 = male, 1 = female; Black = dummy coded race/ethnicity where 1 = Black/African American, 0 = other; Other = dummy coded race/ethnicity where 1 = Latinx, and/or Hispanic, and/or other race/ethnicity, 0 = else.
